# Supplementary material for: Development of a cyan blue-emitting Ba3La2(BO3)4:Ce3+,Tb3+ phosphor for use in dental glazing materials: color tunable emission and energy transfer
Source: Royal Society of Chemistry journal article supplement (doi:10.1039/d1ra04384f), 2021-01-01
Supplement: d1ra04384f1.pdf [file d1ra04384f1.pdf]

## Supporting Information

### **Development of cyan blue-emitting $\text{Ba}_3\text{La}_2(\text{BO}_3)_4:\text{Ce}^{3+},\text{Tb}^{3+}$ phosphor for use in dental glassing materials: color tunable emission and energy transfer**

Gyu Jin Jeong,<sup>1,2</sup> Tae Wook Kang,<sup>1,\*</sup> Young Ji Park,<sup>1</sup> Ye Jin Park,<sup>1,3</sup> Younki Lee,<sup>2</sup> Byungseo Bae,<sup>4,\*</sup> and Sun Woog Kim<sup>1,\*</sup>

<sup>1</sup> Electronic Convergence Materials Division, Optic & Electronic Component Materials Center, Korea Institute of Ceramic Engineering and Technology, Jinju 52851, Korea.

<sup>2</sup> Division of Materials Science and Engineering & Convergence Technology, Gyeongsang National University, Jinju 52828, South Korea

<sup>3</sup> Department of Chemistry, Pusan National University, Busan 46241, Korea

<sup>4</sup> Advanced Resources Team, Yeongwol Industrial Promotion Agency, 21-28 Palgoe 1 nonggongdanji, Yeongwolgun 26240, Korea

\*Corresponding author:

Dr. Tae Wook Kang

E-mail: ktwcj@naver.com

Dr. Byungseo Bae

E-mail: bsbae@yipa.or.kr

Dr. Sun Woog Kim

E-mail:

skim80@kicet.re.kr

## Contents

1. Representative XRD patterns of the  $\text{Ce}^{3+}/\text{Tb}^{3+}$  doped  $\text{Ba}_3\text{La}_2(\text{BO}_3)_4$  phosphors (Figures S1~S3)
2. Refined structural parameters of the  $\text{Ba}_3\text{La}_2(\text{BO}_3)_4$  host material and  $\text{Ce}^{3+}/\text{Tb}^{3+}$  doped  $\text{Ba}_3\text{La}_2(\text{BO}_3)_4$  phosphors (Tables S1~S4)
3. The (a) Ce3d and (b) Tb3d XPS spectra of  $\text{Ba}_3\text{La}_2(\text{BO}_3)_4:0.05\text{Ce}^{3+},0.13\text{Tb}^{3+}$  phosphor (Figure S4)

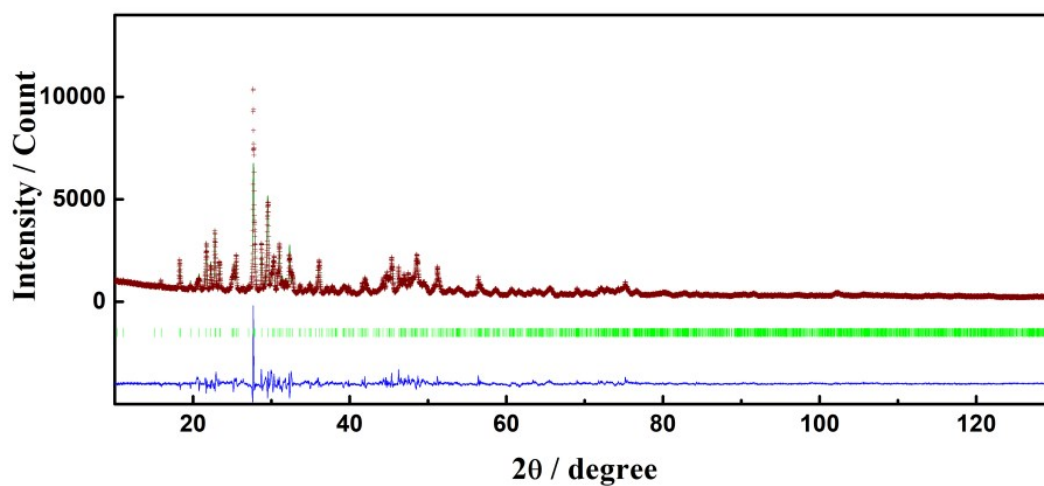

**Figure S1.** Rietveld refinement result for X-ray powder diffraction data of  $\text{Ba}_3\text{La}_2(\text{BO}_3)_4:0.05\text{Ce}^{3+}$ . Red symbol: measured pattern, green solid line: calculated pattern, blue solid line: difference between their intensities.

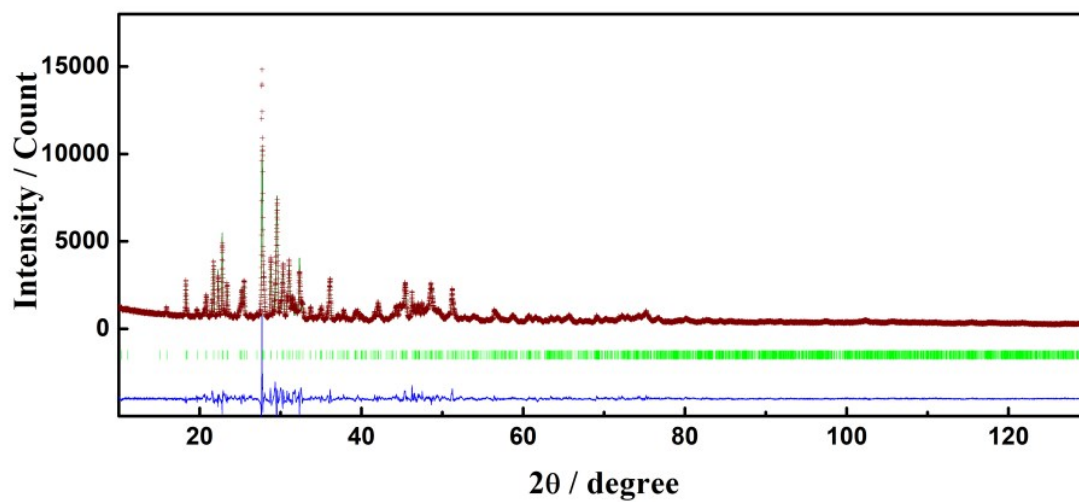

**Figure S2.** Rietveld refinement result for X-ray powder diffraction data of  $\text{Ba}_3\text{La}_2(\text{BO}_3)_4:0.03\text{Tb}^{3+}$ . Red symbol: measured pattern, green solid line: calculated pattern, blue solid line: difference between their intensities.

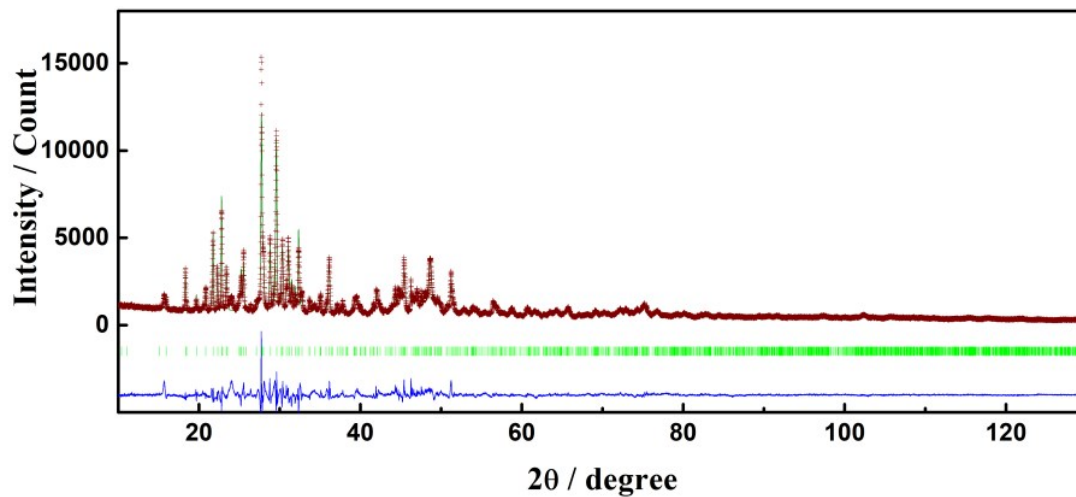

**Figure S3.** Rietveld refinement result for X-ray powder diffraction data of  $\text{Ba}_3\text{La}_2(\text{BO}_3)_4:0.05\text{Ce}^{3+},0.03\text{Tb}^{3+}$  Red symbol: measured pattern, green solid line: calculated pattern, blue solid line: difference between their intensities.

Table S1. Refined structural parameters of the Ba<sub>3</sub>La<sub>2</sub>(BO<sub>3</sub>)<sub>4</sub> host material from the Rietveld refinement using XRD data obtained at room temperature.

| Atom | Site      | Occ. | <i>x</i>  | <i>y</i>  | <i>z</i>  | Beq |
|------|-----------|------|-----------|-----------|-----------|-----|
| La1  | <i>4c</i> | 0.67 | 0.3113(7) | 0.25      | 0.5299(5) | 1.0 |
| Ba1  | <i>4c</i> | 0.33 | 0.3113(7) | 0.25      | 0.5299(5) | 1.0 |
| La2  | <i>8d</i> | 0.33 | 0.1828(3) | 0.1250(2) | 0.1493(1) | 1.0 |
| Ba2  | <i>8d</i> | 0.67 | 0.1828(3) | 0.1250(2) | 0.1493(1) | 1.0 |
| La3  | <i>8d</i> | 0.33 | 0.4813(6) | 0.5825(5) | 0.1769(3) | 1.0 |
| Ba3  | <i>8d</i> | 0.67 | 0.4813(6) | 0.5825(5) | 0.1769(3) | 1.0 |
| B1   | <i>4c</i> | 1    | 0.6473(5) | 0.25      | 0.1616(9) | 1.0 |
| B2   | <i>4c</i> | 1    | 0.4140(7) | 0.75      | 0.3093(1) | 1.0 |
| B3   | <i>8d</i> | 1    | 0.3216(0) | 0.4167(6) | 0.4138(6) | 1.0 |
| O1   | <i>8d</i> | 1    | 0.5466(1) | 0.3100(3) | 0.0909(8) | 1.0 |
| O2   | <i>4c</i> | 1    | 0.3613(5) | 0.25      | 0.2450(9) | 1.0 |
| O3   | <i>4c</i> | 1    | 0.6470(2) | 0.25      | 0.5304(5) | 1.0 |
| O4   | <i>8d</i> | 1    | 0.7525(8) | 0.6804(8) | 0.1845(0) | 1.0 |
| O5   | <i>8d</i> | 1    | 0.6658(1) | 0.6165(8) | 0.4068(8) | 1.0 |
| O6   | <i>8d</i> | 1    | 0.2377(9) | 0.4967(4) | 0.9932(4) | 1.0 |
| O7   | <i>8d</i> | 1    | 0.3546(1) | 0.4579(0) | 0.3369(2) | 1.0 |

Table S2. Refined structural parameters of the  $\text{Ba}_3\text{La}_2(\text{BO}_3)_4:0.05\text{Ce}^{3+}$  phosphor from the Rietveld refinement using XRD data obtained at room temperature.

| Atom | Site | Occ. | $x$       | $y$       | $z$       | Beq |
|------|------|------|-----------|-----------|-----------|-----|
| La1  | $4c$ | 0.62 | 0.3104(8) | 0.25      | 0.5340(3) | 1.0 |
| Ba1  | $4c$ | 0.33 | 0.3104(8) | 0.25      | 0.5340(3) | 1.0 |
| Ce1  | $4c$ | 0.05 | 0.3104(8) | 0.25      | 0.5340(3) | 1.0 |
| La2  | $8d$ | 0.28 | 0.1809(8) | 0.1268(6) | 0.1526(8) | 1.0 |
| Ba2  | $8d$ | 0.67 | 0.1809(8) | 0.1268(6) | 0.1526(8) | 1.0 |
| Ce2  | $4c$ | 0.05 | 0.1809(8) | 0.1268(6) | 0.1526(8) | 1.0 |
| La3  | $8d$ | 0.28 | 0.4809(9) | 0.5816(3) | 0.1760(0) | 1.0 |
| Ba3  | $8d$ | 0.67 | 0.4809(9) | 0.5816(3) | 0.1760(0) | 1.0 |
| Ce3  | $4c$ | 0.05 | 0.4809(9) | 0.5816(3) | 0.1760(0) | 1.0 |
| B1   | $4c$ | 1    | 0.6268(5) | 0.25      | 0.1571(4) | 1.0 |
| B2   | $4c$ | 1    | 0.4143(0) | 0.75      | 0.3325(0) | 1.0 |
| B3   | $8d$ | 1    | 0.3276(5) | 0.4839(8) | 0.4198(3) | 1.0 |
| O1   | $8d$ | 1    | 0.5978(7) | 0.3236(4) | 0.0896(6) | 1.0 |
| O2   | $4c$ | 1    | 0.3787(6) | 0.25      | 0.2266(5) | 1.0 |
| O3   | $4c$ | 1    | 0.6734(5) | 0.25      | 0.5190(5) | 1.0 |
| O4   | $8d$ | 1    | 0.7310(5) | 0.6880(9) | 0.1817(3) | 1.0 |
| O5   | $8d$ | 1    | 0.6649(8) | 0.6236(8) | 0.4164(7) | 1.0 |
| O6   | $8d$ | 1    | 0.2675(0) | 0.4915(4) | 1.0030(1) | 1.0 |
| O7   | $8d$ | 1    | 0.3486(6) | 0.4610(6) | 0.3347(7) | 1.0 |

Table S3. Refined structural parameters of the Ba<sub>3</sub>La<sub>2</sub>(BO<sub>3</sub>)<sub>4</sub>:0.03Tb<sup>3+</sup> phosphor from the Rietveld refinement using XRD data obtained at room temperature.

| Atom | Site      | Occ. | <i>x</i>  | <i>y</i>  | <i>z</i>  | Beq |
|------|-----------|------|-----------|-----------|-----------|-----|
| La1  | <i>4c</i> | 0.62 | 0.3068(1) | 0.25      | 0.5291(5) | 1.0 |
| Ba1  | <i>4c</i> | 0.33 | 0.3068(1) | 0.25      | 0.5291(5) | 1.0 |
| Tb1  | <i>4c</i> | 0.05 | 0.3068(1) | 0.25      | 0.5291(5) | 1.0 |
| La2  | <i>8d</i> | 0.28 | 0.1818(0) | 0.1250(0) | 0.1503(1) | 1.0 |
| Ba2  | <i>8d</i> | 0.67 | 0.1818(0) | 0.1250(0) | 0.1503(1) | 1.0 |
| Tb2  | <i>4c</i> | 0.05 | 0.1818(0) | 0.1250(0) | 0.1503(1) | 1.0 |
| La3  | <i>8d</i> | 0.28 | 0.4802(1) | 0.5837(7) | 0.1763(8) | 1.0 |
| Ba3  | <i>8d</i> | 0.67 | 0.4802(1) | 0.5837(7) | 0.1763(8) | 1.0 |
| Tb3  | <i>4c</i> | 0.05 | 0.4802(1) | 0.5837(7) | 0.1763(8) | 1.0 |
| B1   | <i>4c</i> | 1    | 0.4548(4) | 0.25      | 0.0868(2) | 1.0 |
| B2   | <i>4c</i> | 1    | 0.3802(8) | 0.75      | 0.4089(2) | 1.0 |
| B3   | <i>8d</i> | 1    | 0.2815(4) | 0.4528(5) | 0.4142(5) | 1.0 |
| O1   | <i>8d</i> | 1    | 0.6002(9) | 0.3135(9) | 0.1019(7) | 1.0 |
| O2   | <i>4c</i> | 1    | 0.3812(1) | 0.25      | 0.2269(0) | 1.0 |
| O3   | <i>4c</i> | 1    | 0.6476(5) | 0.25      | 0.5383(3) | 1.0 |
| O4   | <i>8d</i> | 1    | 0.7651(2) | 0.6877(5) | 0.1805(7) | 1.0 |
| O5   | <i>8d</i> | 1    | 0.6649(7) | 0.6230(6) | 0.4032(7) | 1.0 |
| O6   | <i>8d</i> | 1    | 0.2786(7) | 0.4944(9) | 0.9956(8) | 1.0 |
| O7   | <i>8d</i> | 1    | 0.3749(4) | 0.4537(8) | 0.3384(7) | 1.0 |



Table S4. Refined structural parameters of the  $\text{Ba}_3\text{La}_2(\text{BO}_3)_4:0.05\text{Ce}^{3+}, 0.03\text{Tb}^{3+}$  phosphor from the Rietveld refinement using XRD data obtained at room temperature.

| Atom | Site | Occ. | $x$       | $y$       | $z$       | Beq |
|------|------|------|-----------|-----------|-----------|-----|
| La1  | $4c$ | 0.59 | 0.3054(9) | 0.25      | 0.5337(3) | 1.0 |
| Ba1  | $4c$ | 0.33 | 0.3054(9) | 0.25      | 0.5337(3) | 1.0 |
| Ce1  | $4c$ | 0.05 | 0.3054(9) | 0.25      | 0.5337(3) | 1.0 |
| Tb1  | $4c$ | 0.03 | 0.3054(9) | 0.25      | 0.5337(3) | 1.0 |
| La2  | $8d$ | 0.25 | 0.1842(8) | 0.1260(6) | 0.1541(0) | 1.0 |
| Ba2  | $8d$ | 0.67 | 0.1842(8) | 0.1260(6) | 0.1541(0) | 1.0 |
| Ce2  | $4c$ | 0.05 | 0.1842(8) | 0.1260(6) | 0.1541(0) | 1.0 |
| Tb2  | $4c$ | 0.03 | 0.1842(8) | 0.1260(6) | 0.1541(0) | 1.0 |
| La3  | $8d$ | 0.25 | 0.4794(3) | 0.5830(4) | 0.1778(7) | 1.0 |
| Ba3  | $8d$ | 0.67 | 0.4794(3) | 0.5830(4) | 0.1778(7) | 1.0 |
| Ce3  | $4c$ | 0.05 | 0.4794(3) | 0.5830(4) | 0.1778(7) | 1.0 |
| Tb3  | $4c$ | 0.03 | 0.4794(3) | 0.5830(4) | 0.1778(7) | 1.0 |
| B1   | $4c$ | 1    | 0.6405(1) | 0.25      | 0.1472(1) | 1.0 |
| B2   | $4c$ | 1    | 0.3929(6) | 0.75      | 0.3855(0) | 1.0 |
| B3   | $8d$ | 1    | 0.2665(8) | 0.4911(5) | 0.4303(5) | 1.0 |
| O1   | $8d$ | 1    | 0.5964(7) | 0.3235(0) | 0.0868(8) | 1.0 |
| O2   | $4c$ | 1    | 0.4057(7) | 0.25      | 0.2249(1) | 1.0 |
| O3   | $4c$ | 1    | 0.6575(9) | 0.25      | 0.5172(0) | 1.0 |
| O4   | $8d$ | 1    | 0.7411(6) | 0.6944(0) | 0.2060(5) | 1.0 |
| O5   | $8d$ | 1    | 0.6530(7) | 0.6097(0) | 0.4441(8) | 1.0 |
| O6   | $8d$ | 1    | 0.2716(7) | 0.4910(8) | 1.0159(3) | 1.0 |
| O7   | $8d$ | 1    | 0.3720(2) | 0.4620(7) | 0.3480(3) | 1.0 |

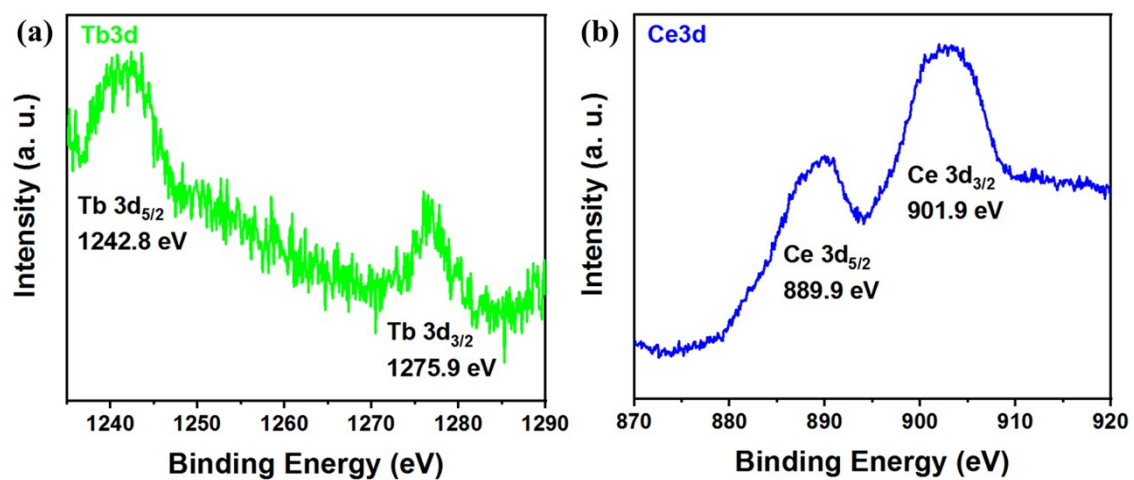

**Figure S4.** The (a) Ce3d and (b) Tb3d XPS spectra of  $\text{Ba}_3\text{La}_2(\text{BO}_3)_4:0.05\text{Ce}^{3+},0.13\text{Tb}^{3+}$  phosphor.
